# Supplementary material
Source: PubMed Central journal article supplement (PMC4946138)
Supplement: EMBJ-35-1565-s001.pdf [file EMBJ-35-1565-s001.pdf]

# **Nucleosome eviction assists condensin loading and chromosome condensation**

Esther Toselli-Mollereau, Xavier Robellet, Lydia Fauque, Sébastien Lemaire, Christoph Schiklenk, Carlo Klein, Clémence Hocquet, Pénélope Legros, Lia N'Guyen, Léo Mouillard, Emilie Chautard, Didier Auboeuf, Christian Haering and Pascal Bernard

## **Appendix table of contents**

Appendix\_Figure S1 related to Figure 1

Appendix\_Table S1 related to Figure 1

Appendix\_Table S2\_Strain list

Appendix\_Table S3\_qPCR primers used in this study

Appendix\_Table S4\_Antibodies used in this study

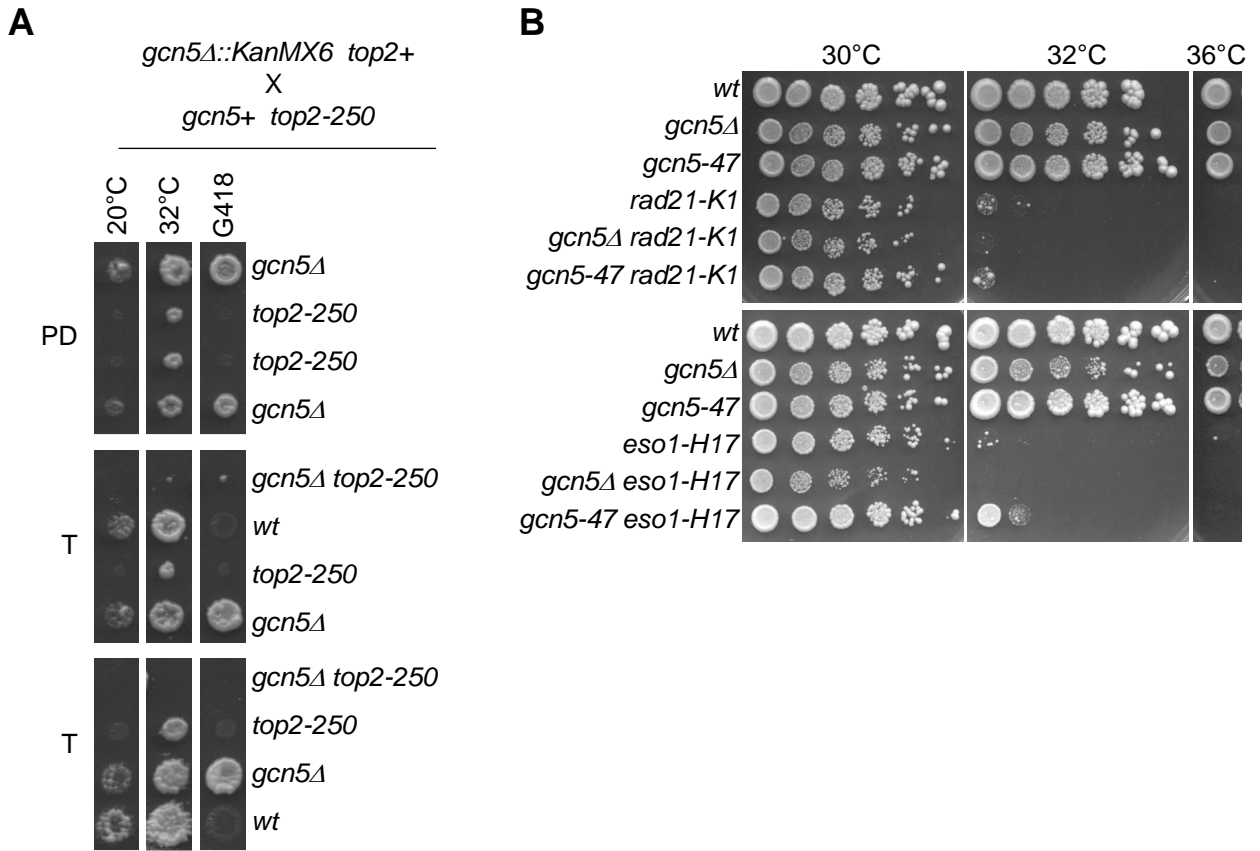

**Appendix Figure S1. Lack of *gcn5* is synthetically lethal with *top2-250* but not with *rad21-K1* or *eso1-H17***

**A.** Tetrad analysis of a cross between a *gcn5Δ::kanMX6* strain and a cryosensitive *top2-250* strain. Dissected tetrads were replicaplated onto YES+A medium at 20°C, 32°C and YES+A supplemented with G418 to select for KanMX6 expression. Three tetrads are shown, 1 parental ditype (PD) and two tetratypes (T). **B.** Fivefold serial dilutions of indicated strains were spotted onto YES+A at the indicated temperatures.

**Appendix Table S1**

| Strain | Genotype                                                                                                                                                                                                  | Distance | Cells | Replicates |
|--------|-----------------------------------------------------------------------------------------------------------------------------------------------------------------------------------------------------------|----------|-------|------------|
| 2779   | <i>h<sup>-</sup>, Chr1 1.50Mb::TetO-hphMX6, Chr1 2.49Mb::LacO-natMX4, his7-366::EGFP-lacI-NLS-his7<sup>+</sup>, leu1-32::TetR-tdTomato-NLS-leu1<sup>+</sup>, ade6-M210, lys1-131, ura4-D18</i>            | 1 Mb     | 59    | 1          |
| 2930   | <i>h<sup>?</sup>, cut14-208, Chr1 1.50Mb::TetO-hphMX6, Chr1 2.49Mb::LacO-natMX4, his7-366::EGFP-lacI-NLS-his7<sup>+</sup>, leu1-32::TetR-tdTomato-NLS-leu1<sup>+</sup>, ade6-M210, lys1-131, ura4-D18</i> | 1 Mb     | 32    | 1          |
| 4020   | <i>h<sup>?</sup>, Chr1 1.50Mb::TetO-hphMX6, Chr1 2.49Mb::LacO-natMX4, his7-366::EGFP-lacI-NLS-his7<sup>+</sup>, leu1-32::TetR-tdTomato-NLS-leu1<sup>+</sup>, ade6-M210, lys1-131, ura4-D18</i>            | 1 Mb     | 105   | 2          |
| 4021   | <i>h<sup>?</sup>, gcn5-47, Chr1 1.50Mb::TetO-hphMX6, Chr1 2.49Mb::LacO-natMX4, his7-366::EGFP-lacI-NLS-his7<sup>+</sup>, leu1-32::TetR-tdTomato-NLS-leu1<sup>+</sup>, ade6-M210, lys1-131, ura4-D18</i>   | 1 Mb     | 52    | 2          |
| 4215   | <i>h<sup>?</sup>, Chr1 1.5Mb::TetO-hphMX6, Chr1 1.95Mb::LacO-natMX, his7-366::EGFP-lacI-NLS-his7<sup>+</sup>, leu1-32::TetR-tdTomato-NLS-leu1<sup>+</sup>, ade6-M210, lys1-131, ura4-D18</i>              | 0.5 Mb   | 44    | 1          |
| 4217   | <i>h<sup>?</sup>, cut14-208, Chr1 1.5Mb::TetO-hphMX6, Chr1 1.95Mb::LacO-natMX, his7-366::EGFP-lacI-NLS-his7<sup>+</sup>, leu1-32::TetR-tdTomato-NLS-leu1<sup>+</sup>, ade6-M210, lys1-131, ura4-D18</i>   | 0.5 Mb   | 63    | 2          |
| 4219   | <i>h<sup>?</sup> Chr1 1.5Mb::TetO-hphMX6, Chr1 1.95Mb::LacO-natMX, his7-366::EGFP-lacI-NLS-his7<sup>+</sup>, leu1-32::TetR-tdTomato-NLS-leu1<sup>+</sup>, ade6-M210, lys1-131, ura4-D18</i>               | 0.5 Mb   | 50    | 1          |
| 4221   | <i>h<sup>?</sup>, gcn5-47, Chr1 1.5Mb::TetO-hphMX6, Chr1 1.95Mb::LacO-natMX, his7-366::EGFP-lacI-NLS-his7<sup>+</sup>, leu1-32::TetR-tdTomato-NLS-leu1<sup>+</sup>, ade6-M210, lys1-131, ura4-D18</i>     | 0.5 Mb   | 65    | 2          |

**Appendix Table S2. Yeast strains used in this study**

| Figure    | strain number | Genotype* |                                                                                                                   | Origin          |
|-----------|---------------|-----------|-------------------------------------------------------------------------------------------------------------------|-----------------|
| Fig. 1A   | <b>LY113</b>  | <i>h-</i> | <i>leu1- ura4- ade6-</i>                                                                                          | our stock       |
|           | <b>LY1069</b> | <i>h-</i> | <i>leu1- ura4- cut3-477</i>                                                                                       | YGRC            |
|           | <b>LY855</b>  | <i>h+</i> | <i>leu1- ura4- ade6- gcn5-47</i>                                                                                  | this study      |
|           | <b>LY614</b>  | <i>h-</i> | <i>leu1- ura4- ade6- cut3-477 gcn5-47</i>                                                                         | this study      |
|           | <b>LY1292</b> | <i>h-</i> | <i>leu1- ura4 ade6- gcn5Δ::KanR</i>                                                                               | this study      |
|           | <b>LY1318</b> | <i>h-</i> | <i>leu1- ura4- ade6- cut3-477 gcn5Δ::KanR</i>                                                                     | this study      |
| Fig. 1C   | <b>CH4020</b> | <i>h?</i> | <i>ura4- ade6- lys1- LacI-gfp-his7+ TetR-tomato-Leu1+ chr1 (2,49)::LacO-NatR chr1(1,5)::TetO-HygroR</i>           | this study      |
|           | <b>CH2930</b> | <i>h?</i> | <i>ura4- ade6- lys1- cut14-208 LacI-gfp-his7+ TetR-tomato-Leu1+ chr1 (2,49)::LacO-NatR chr1(1,5)::TetO-HygroR</i> | this study      |
|           | <b>CH4021</b> | <i>h?</i> | <i>ura4- ade6- lys1- gcn5-47 LacI-gfp-his7+ TetR-tomato-Leu1+ chr1 (2,49)::LacO-NatR chr1(1,5)::TetO-HygroR</i>   | this study      |
|           | <b>CH4215</b> | <i>h?</i> | <i>ura4- ade6- lys1- LacI-gfp-his7+ TetR-tomato-leu1+ Chr1(1,95)::LacO-NatR Chr1(1,5)::TetO-HygroR</i>            | this study      |
|           | <b>CH4217</b> | <i>h?</i> | <i>ura4- ade6- lys1- cut14-208 LacI-gfp-his7+ TetR-tomato-leu1+ Chr1(1,95)::LacO-NatR Chr1(1,5)::TetO-HygroR</i>  | this study      |
|           | <b>CH4219</b> | <i>h?</i> | <i>ura4- ade6- lys1- LacI-gfp-his7+ TetR-tomato-leu1+ Chr1(1,95)::LacO-NatR Chr1(1,5)::TetO-HygroR</i>            | this study      |
|           | <b>CH4221</b> | <i>h?</i> | <i>ura4- ade6- lys1- gcn5-47 LacI-gfp-his7+ TetR-tomato-leu1+ Chr1(1,95)::LacO-NatR Chr1(1,5)::TetO-HygroR</i>    | this study      |
| Fig. 1D-E | <b>LY1139</b> | <i>h+</i> | <i>leu1- ura4- mis6-3HA-LEU2 cdc11-GFP-KanR</i>                                                                   | this study      |
|           | <b>LY1357</b> | <i>h-</i> | <i>leu1- ura4- gcn5-47 mis6-3HA-LEU2 cdc11-GFP-KanR</i>                                                           | this study      |
|           | <b>LY1354</b> | <i>h?</i> | <i>leu1- ura4- cut3-477 mis6-3HA-LEU2 cdc11-GFP-KanR</i>                                                          | this study      |
| Fig. 2A   | <b>LY1491</b> | <i>h+</i> | <i>leu1- ura4- ada2Δ::KanR</i>                                                                                    | this study      |
|           | <b>LY1519</b> | <i>h-</i> | <i>leu1- ura4- ade6 ? cut3-477 ada2Δ::KanR</i>                                                                    | this study      |
|           | <b>LY1492</b> | <i>h+</i> | <i>leu1- ura4- ada3Δ::KanR</i>                                                                                    | this study      |
|           | <b>LY1520</b> | <i>h-</i> | <i>leu1- ura4- ade6 ? cut3-477 ada3Δ::KanR</i>                                                                    | this study      |
|           | <b>LY1658</b> | <i>h+</i> | <i>ura4- ade6- spt8Δ::ura4+</i>                                                                                   | Fred Winston    |
|           | <b>LY1698</b> | <i>h?</i> | <i>leu1- ura4- ade6- cut3-477 spt8Δ::ura4+</i>                                                                    | this study      |
|           | <b>LY2637</b> | <i>h+</i> | <i>ura4- ade6- spt20Δ::ura4+</i>                                                                                  | Dom. Helmlinger |
|           | <b>LY2738</b> | <i>h-</i> | <i>leu1- ura4- ade? cut3-477 spt20Δ::ura4+</i>                                                                    | this study      |
|           | <b>LY1490</b> | <i>h+</i> | <i>leu1- ura4- sgf11Δ::KanR</i>                                                                                   | this study      |

|             |               |            |                          |                                                           |                                              |
|-------------|---------------|------------|--------------------------|-----------------------------------------------------------|----------------------------------------------|
|             | <b>LY1518</b> | <i>h-</i>  | <i>leu1- ura4- ade6?</i> | <i>cut3-477 sgf11Δ::KanR</i>                              | this study                                   |
|             | <b>LY2636</b> | <i>h+</i>  | <i>leu1- ura4- ade6-</i> | <i>sgf73Δ::ura4+</i>                                      | Dom. Helmlinger                              |
|             | <b>LY2742</b> | <i>h-</i>  | <i>leu1- ura4- ade6?</i> | <i>cut3-477 sgf73Δ::ura4+</i>                             | this study                                   |
|             | <b>LY1941</b> | <i>h-</i>  | <i>ura4- ade6-</i>       | <i>tra1Δ::HygroR</i>                                      | Dom. Helmlinger                              |
|             | <b>LY1979</b> | <i>h-</i>  | <i>leu1- ura4-</i>       | <i>cut3-477 tra1Δ::HygroR</i>                             | this study                                   |
| Fig. 2B     | <b>LY1659</b> | <i>h+</i>  | <i>ura4- ade6-</i>       | <i>gcn5-myc13-NatR</i>                                    | Fred Winston                                 |
|             | <b>LY1660</b> | <i>h+</i>  | <i>ura4- ade6-</i>       | <i>gcn5-191-myc13-NatR</i>                                | Fred Winston                                 |
|             | <b>LY1786</b> | <i>h-</i>  | <i>leu1- ura4- ade6-</i> | <i>cut3-477 gcn5-191-myc13-NatR</i>                       | this study                                   |
|             | <b>LY1788</b> | <i>h-</i>  | <i>leu1- ura4- ade6-</i> | <i>cut3-477 gcn5-myc13-NatR</i>                           | this study                                   |
| Fig. 2C     | <b>LY1694</b> | <i>h+</i>  | <i>leu1- ura4- ade6-</i> | <i>hat1Δ::KanR</i>                                        | this study                                   |
|             | <b>LY1740</b> | <i>h+</i>  | <i>leu1- ura4-</i>       | <i>cut3-477 hat1Δ::KanR</i>                               | this study                                   |
|             | <b>LY1695</b> | <i>h+</i>  | <i>leu1- ura4- ade6-</i> | <i>naa40Δ::KanR</i>                                       | this study                                   |
|             | <b>LY1742</b> | <i>h+</i>  | <i>leu1- ura4-</i>       | <i>cut3-477 naa40Δ::KanR</i>                              | this study                                   |
|             | <b>LY1635</b> | <i>h+</i>  | <i>leu1- ura4- ade6-</i> | <i>mst2Δ::ura4+</i>                                       | Susan Forsburg                               |
|             | <b>LY1686</b> | <i>h+</i>  | <i>leu1- ura4- ade6?</i> | <i>cut3-477 Dmst2::ura4+</i>                              | this study                                   |
|             | <b>LY1682</b> | <i>h90</i> | <i>leu1- ura4- ade6?</i> | <i>rtt109Δ::KanR</i>                                      | Blerta Xhemalce                              |
|             | <b>LY1726</b> | <i>h-</i>  | <i>leu1- ura4- ade6?</i> | <i>cut3-477 rtt109Δ::KanR</i>                             | this study                                   |
|             | <b>LY1636</b> | <i>h+</i>  | <i>leu1- ura4- ade6-</i> | <i>elp3Δ::KanR</i>                                        | Susan Forsburg                               |
|             | <b>LY1778</b> | <i>h?</i>  | <i>leu1- ura4- ade6-</i> | <i>cut3-477 elp3Δ::KanR</i>                               | this study                                   |
| Fig. 2D     | <b>LY2514</b> | <i>h-</i>  | <i>leu1- ura4- ade6?</i> | <i>cut3-477 gcn5Δ::NatR mst2Δ::ura4+</i>                  | this study                                   |
|             | <b>LY2516</b> | <i>h-</i>  | <i>leu1- ura4- ade6?</i> | <i>gcn5Δ::NatR mst2Δ::ura4+</i>                           | this study                                   |
|             | <b>LY2520</b> | <i>h-</i>  | <i>leu1- ura4- ade6?</i> | <i>cut3-477 gcn5Δ::NatR</i>                               | this study                                   |
|             | <b>LY2059</b> | <i>h-</i>  | <i>leu1- ura4- ade6-</i> | <i>gcn5Δ::NatR</i>                                        | this study                                   |
| Fig. 3A-B   | <b>LY270</b>  | <i>h-</i>  | <i>leu1- ura4-</i>       | <i>nda3-KM311</i>                                         | this study                                   |
| Fig. EV3D-E | <b>LY3201</b> | <i>h+</i>  | <i>leu1- ura4-</i>       | <i>nda3-KM311 gcn5Δ::NatR Dmst2::ura4+</i>                | this study                                   |
|             | <b>LY1802</b> | <i>h-</i>  | <i>leu1- ura4-</i>       | <i>nda3-KM311 cnd2-gfp-LEU2</i>                           | this study (cnd2-GFP-LEU2 from YGRC)         |
|             | <b>LY1349</b> | <i>h-</i>  | <i>leu1- ura4- ade6-</i> | <i>nda3-KM311 gcn5Δ::KanR cnd2-gfp-LEU2</i>               | this study                                   |
|             | <b>LY3200</b> | <i>h-</i>  | <i>leu1- ura4-</i>       | <i>nda3-KM311 gcn5Δ::NatR Dmst2::ura4+ cnd2-gfp-LEU2</i>  | this study                                   |
| Fig. 3C-D   | <b>LY2440</b> | <i>h+</i>  | <i>leu1-</i>             | <i>dam1-GFP-HygroR</i>                                    | this study                                   |
|             | <b>LY2672</b> | <i>h-</i>  | <i>leu1- ura4-</i>       | <i>cut3-HA-KanR dam1-gfp-HygroR</i>                       | this study (cut3-HA-KanR from Michael Keogh) |
|             | <b>LY2794</b> | <i>h+</i>  | <i>leu1- ura4- ade6?</i> | <i>cut3-HA-KanR dam1-gfp-Hph gcn5Δ::NatR</i>              | this study                                   |
|             | <b>LY2791</b> | <i>h90</i> | <i>leu1- ura4- ade6?</i> | <i>cut3-HA-KanR dam1-gfp-Hph gcn5Δ::NatR Dmst2::ura4+</i> | this study                                   |
| Fig. 4A     | <b>LY270</b>  | <i>h-</i>  | <i>leu1- ura4-</i>       | <i>nda3-KM311</i>                                         | this study                                   |
|             | <b>LY346</b>  | <i>h-</i>  | <i>leu1- ura4?</i>       | <i>nda3-KM311 cut14-3HA-His6-ura4+</i>                    | this study (cut14-HA from YGRC)              |
|             | <b>LY1930</b> | <i>h-</i>  | <i>leu1- ura4-</i>       | <i>nda3-KM311 cut14-3HA-His6-ura4+ gcn5-myc-NatR</i>      | this study                                   |

|                   |                        |           |                          |                                                                          |                                |
|-------------------|------------------------|-----------|--------------------------|--------------------------------------------------------------------------|--------------------------------|
| Fig. 4B& EV5A     | <a href="#">LY270</a>  | <i>h-</i> | <i>leu1- ura4-</i>       | <i>nda3-KM311</i>                                                        | this study                     |
|                   | <a href="#">LY1794</a> | <i>h-</i> | <i>ura4- ade6?</i>       | <i>nda3-KM311 gcn5-myc-NatR</i>                                          | this study                     |
| Fig. 4C           | <a href="#">LY1802</a> | <i>h-</i> | <i>leu1- ura4-</i>       | <i>nda3-KM311 cnd2-gfp-LEU2</i>                                          | this study                     |
| Fig 4D-E, EV5B.   | <a href="#">LY1802</a> | <i>h-</i> | <i>leu1- ura4-</i>       | <i>nda3-KM311 cnd2-gfp-LEU2</i>                                          | this study                     |
| Fig. 5, EV6A, C-D | <a href="#">LY1349</a> | <i>h-</i> | <i>leu1- ura4- ade6-</i> | <i>nda3-KM311 cnd2-gfp-LEU2 gcn5Δ::KanR</i>                              | this study                     |
| & EV7.            | <a href="#">LY3200</a> | <i>h-</i> | <i>leu1- ura4-</i>       | <i>nda3-KM311 cnd2-gfp-LEU2 gcn5Δ::NatR Dmst2::ura4+</i>                 | this study                     |
| Fig.6A-D          | <a href="#">LY1802</a> | <i>h-</i> | <i>leu1- ura4-</i>       | <i>nda3-KM311 cnd2-gfp-LEU2</i>                                          | this study                     |
| Fig. EV8          | <a href="#">LY3733</a> | <i>h-</i> | <i>leu1- ura4- ade6?</i> | <i>nda3-KM311 cnd2-gfp-LEU2 arp9Δ::NatR</i>                              | this study                     |
|                   | <a href="#">LY3766</a> | <i>h-</i> | <i>leu1- ura4- ade6?</i> | <i>nda3-KM311 cnd2-gfp-LEU2 snf21-129</i>                                | this study                     |
| Fig. 6E-F         | <a href="#">LY3744</a> | <i>h-</i> | <i>leu1- ura4- ade6?</i> | <i>nda3-KM311 snf21-flag-KanR cnd2-gfp-LEU2</i>                          | this study                     |
|                   | <a href="#">LY3745</a> | <i>h+</i> | <i>leu1- ura4- ade6?</i> | <i>nda3-KM311 gcn5Δ::NatR snf21-flag-KanR cnd2-gfp-LEU2</i>              | this study                     |
|                   | <a href="#">LY3746</a> | <i>h+</i> | <i>leu1- ura4- ade6?</i> | <i>nda3-KM311 gcn5Δ::NatR mst2Δ::ura4+ snf21-flag-KanR cnd2-gfp-LEU2</i> | this study                     |
| Fig. S1A & S1B    | <a href="#">LY42</a>   | <i>h-</i> | <i>leu1-</i>             | <i>top2-250cs</i>                                                        | YGRC                           |
|                   | <a href="#">LY1557</a> | <i>h?</i> | <i>leu1-</i>             | <i>eso1-H17ts sid4-Tomato-HygroR</i>                                     | this study                     |
|                   | <a href="#">LY1530</a> | <i>h-</i> | <i>leu1-</i>             | <i>eso1-H17ts gcn5Δ::KanR sid4-Tomato-HygroR</i>                         | this study                     |
|                   | <a href="#">LY1544</a> | <i>h-</i> | <i>leu1- ura4- ade6-</i> | <i>rad21-K1ts-ura4+ gcn5Δ::KanR sid4-Tomato-HygroR</i>                   | this study                     |
|                   | <a href="#">LY1562</a> | <i>h?</i> | <i>leu1- ura4- ade6-</i> | <i>rad21-K1ts-ura4+ sid4-Tomato-HygroR</i>                               | this study                     |
| Fig. EV1          | <a href="#">LY1889</a> | <i>h-</i> | <i>leu- ura4- ade6?</i>  | <i>cdc11-gfp-KanR pREP-fib1-RFP-LEU2</i>                                 | this study                     |
|                   | <a href="#">LY1938</a> | <i>h-</i> | <i>leu1- ura4?</i>       | <i>cut3-477 cdc11-gfp-KanR pREP-fib1-RFP-LEU2</i>                        | this study                     |
|                   | <a href="#">LY1942</a> | <i>h-</i> | <i>leu1- ura4-</i>       | <i>gcn5-47 cdc11-gfp-KanR pREP-fib1-RFP-LEU2</i>                         | this study                     |
| Fig. EV2A and D   | <a href="#">LY113</a>  | <i>h-</i> | <i>leu1- ura4- ade6-</i> |                                                                          | our stock                      |
|                   | <a href="#">LY855</a>  | <i>h+</i> | <i>leu1- ura4- ade6-</i> | <i>gcn5-47</i>                                                           | this study                     |
|                   | <a href="#">LY1292</a> | <i>h-</i> | <i>leu1- ura4 ade6-</i>  | <i>gcn5Δ::KanR</i>                                                       | this study                     |
| Fig. EV2B         | <a href="#">LY393</a>  | <i>h+</i> | <i>leu1- ura4- ade6-</i> | <i>cut3-gfp-ura4+</i>                                                    | this study                     |
|                   | <a href="#">LY710</a>  | <i>h-</i> | <i>leu1- ura4- ade6-</i> | <i>gcn5-47 cut3-gfp-ura4+</i>                                            | this study                     |
|                   | <a href="#">LY1436</a> | <i>h-</i> | <i>leu1- ura4-</i>       | <i>gcn5Δ::KanR cut3-gfp-ura4+ sid4-tomato-HygroR</i>                     | this study                     |
|                   | <a href="#">LY2341</a> | <i>h+</i> | <i>leu1- ura4- ade6?</i> | <i>top2-HA-ura4+ dam1-gfp-KanR</i>                                       | this study (Top2-HA from YGRC) |
|                   | <a href="#">LY2342</a> | <i>h+</i> | <i>leu1- ura4- ade6?</i> | <i>gcn5-47 top2-HA-ura4+ dam1-gfp-KanR</i>                               | this study                     |
|                   | <a href="#">LY2343</a> | <i>h+</i> | <i>leu1- ura4- ade6?</i> | <i>gcn5Δ::NatR top2-HA-ura4+ dam1-gfp-KanR</i>                           | this study                     |
|                   | <a href="#">LY2344</a> | <i>h+</i> | <i>leu1- ura4- ade6?</i> | <i>cut3-477 top2-HA-ura4+ dam1-gfp-KanR</i>                              | this study                     |
| Fig. EV2C         | <a href="#">LY270</a>  | <i>h-</i> | <i>leu1- ura4-</i>       | <i>nda3-KM311</i>                                                        | this study                     |
|                   | <a href="#">LY348</a>  | <i>h+</i> | <i>leu1- ura4?</i>       | <i>nda3-KM311 cut3-3HA-His6-ura4+</i>                                    | this study                     |
|                   | <a href="#">LY388</a>  | <i>h-</i> | <i>leu1- ura4-</i>       | <i>nda3-KM311 cut3-HA-His6-ura4+ cnd2-GFP-LEU2</i>                       | this study                     |
|                   | <a href="#">LY1797</a> | <i>h+</i> | <i>leu1- ura4-</i>       | <i>nda3-KM311 gcn5Δ::KanR cut3-HA-His6-ura4+</i>                         | this study                     |
|                   | <a href="#">LY1799</a> | <i>h+</i> | <i>leu1- ura4-</i>       | <i>nda3-KM311 gcn5Δ::KanR cut3-HA-His6-ura4+ cnd2-gfp-LEU2</i>           | this study                     |

|             |               |           |                          |                                                               |                                               |
|-------------|---------------|-----------|--------------------------|---------------------------------------------------------------|-----------------------------------------------|
| Fig. EV2E-F | <b>LY1638</b> | <i>h-</i> | <i>leu1- ura4- ade6?</i> | <i>gcn5-47 ars1-FYG45.H14-cnp3-LEU2</i>                       | this study                                    |
|             | <b>LY1662</b> | <i>h-</i> | <i>leu1- ura4- ade6-</i> | <i>cut3-477 ars1-FYG45.H14-cnp3-LEU2</i>                      | this study                                    |
|             | <b>LY1667</b> | <i>h-</i> | <i>leu1- ura4- ade6?</i> | <i>cut3-477 gcn5-47 ars1-FYG45.H14-cnp3-LEU2</i>              | this study                                    |
| Fig. EV3A-C | <b>LY270</b>  | <i>h-</i> | <i>leu1- ura4-</i>       | <i>nda3-KM311</i>                                             | this study                                    |
|             | <b>LY1802</b> | <i>h-</i> | <i>leu1- ura4-</i>       | <i>nda3-KM311 cnd2-gfp-LEU2</i>                               | this study                                    |
|             | <b>LY2046</b> | <i>h-</i> | <i>leu1- ura4-</i>       | <i>nda3-KM311 cut3-477 cnd2-gfp-LEU2</i>                      | this study                                    |
| Fig. EV4A-B | <b>LY2341</b> | <i>h+</i> | <i>leu1- ura4- ade6-</i> | <i>top2-HA-ura4+ dam1-gfp-KanR</i>                            | this study                                    |
|             | <b>LY2343</b> | <i>h+</i> | <i>leu1- ura4- ade6?</i> | <i>gcn5Δ::NatR top2-HA-ura4+ dam1-gfp-KanR</i>                | this study                                    |
|             | <b>LY3388</b> | <i>h?</i> | <i>leu1- ura4-</i>       | <i>gcn5Δ::NatR mst2Δ::ura4+ top2-HA-ura4+ dam1-gfp-HygroR</i> | this study                                    |
|             | <b>LY2344</b> | <i>h+</i> | <i>leu1- ura4- ade6?</i> | <i>cut3-477 top2-HA-ura4+ dam1-gfp-KanR</i>                   | this study                                    |
|             | <b>LY1730</b> | <i>h+</i> | <i>leu1-</i>             | <i>dam1-gfp-KanR</i>                                          | this study                                    |
|             | <b>LY3345</b> | <i>h-</i> | <i>leu1- ura4- ade6-</i> | <i>dam1-gfp-HygroR mis4-HA-LEU2</i>                           | this study (mis4-HA-LEU2 from JPaul Javerzat) |
|             | <b>LY3343</b> | <i>h-</i> | <i>leu1- ura4- ade6-</i> | <i>gcn5Δ::NatR mst2Δ::ura4+ dam1-gfp-HygroR mis4-HA-LEU2</i>  | this study                                    |

\* *leu1-*: *leu1-32* ; *ura4-* : *ura4D18* or *DS/E* ; *ade6-* : *ade6-210* or *-216* ; *lys1-* : *lys1-131*.

**Table S3. List of qPCR primers used in this study**

| Chromosome site | Primers    | Sequence                | Figures                             |
|-----------------|------------|-------------------------|-------------------------------------|
| cnt1            | cnt1qL1    | ACCGTTGCAACTTACATCAGC   | Fig. 3A, EV3                        |
|                 | cnt1qR1    | GGTCGCCAAATAGCAATGAG    |                                     |
| dh1             | cendh1qL1  | CGCTTTGTTGCTGTGGACTA    | Fig. 3A, 4E, EV3, EV5B              |
|                 | cendh1qR1  | AACACGGCGATAAGAAATGG    |                                     |
| rds1 5'IGR      | rds1s-2qL1 | TCTGGCTCCTCGTCATTTTC    | Fig. 3A, EV3A, EV3D                 |
|                 | rds1s-2qR1 | TCATCGCTTCCAACCCCTTAC   |                                     |
| rds1 CDS        | rds1s+3qL1 | AAGCGTCGAATTGGCTTG      | Fig. EV3D                           |
|                 | rds1s+3qR1 | GTTGCCGGTGATGTTTAAGG    |                                     |
| gas1 5'IGR      | Gas1qL1    | ACGACAGAATTGCCACGTTC    | Fig. EV3D                           |
|                 | Gas1qR1    | CGTTTTGGGGGAATACAGTG    |                                     |
| gas1 CDS        | Gas1qL2    | CCGTTCTGTGACGTTAAATCC   | Fig. EV3D                           |
|                 | Gas1qR2    | CATCATCACCGCAGTCAAAG    |                                     |
| gas1 3'IGR      | Gas1qL2    | AATAGCATGTGCGAGTTGTATGG | Fig. 3A                             |
|                 | Gas1qR3    | TGTCATCGCGAAACCTTACC    |                                     |
| prl53 5'IGR     | prl53qL2   | TAGTTTGTGGGGGAGTGG      | Fig. 4B, 4E, 5F, 6B, 6F, EV3D, EV5B |
|                 | prl53qR2   | TAGAACTGGGAGGGACAACC    |                                     |
| prl53 CDS       | prl53qL1   | CAAGGGCTGTTTTGTCAGT     | Fig. 3A, 6C, EV3A, EV3D             |
|                 | prl53qR1   | TCCCTGTTTAGCATGGAAG     |                                     |
| prl53 3'IGR     | prl53 qL4  | ACATGTCAGGGTTCAGTACACG  | Fig. EV5, EV7                       |
|                 | prl53 qR4  | TCGCTATACGCAACAAGTGC    |                                     |
| ecm33 5'IGR     | ecm33qL1   | CAAAGTTTGGTCGCAAGCTC    | Fig. 4B, 4E, 5F, 6B, 6F, EV3D, EV5B |
|                 | ecm33qR1   | AGGTGCGCAATTCGTTG       |                                     |
| ecm33 CDS       | Ecm33qL2   | TTCGGTTCCTTACCTTACCG    | Fig. EV3D                           |
|                 | Ecm33qR2   | AACGAAACCACCACCAACAG    |                                     |
| ecm33 3'IGR     | Ecm33qL3   | TCAGTGCACGTTGTTTAGC     | Fig. 3A, 6C, EV5, EV7               |
|                 | Ecm33qR3   | AGAAACAAGCCGGAGATCCTAC  |                                     |
| B1E7.04c 5'IGR  | B1E7qL1    | ATTCGATTCCTCGCTACCTCTC  | Fig. EV3D                           |
|                 | B1E7qR1    | CACGTGGTTGGCATAGCAAC    |                                     |
| B1E7.04c CDS    | B1E7qL2    | TGTTTCAAGTTCGCCGGTTG    | Fig. EV3D                           |
|                 | B1E7qR2    | GAAAGGCTTGCCGAGTAAGTG   |                                     |
| B1E7.04c 3' IGR | Rpc82qL3   | AAGCTTCTCGTTAGATGATATGG | Fig. 3A                             |
|                 | Rpc82qR3   | AAGCAAAAGAAGTGCCGAAG    |                                     |
| snoU14 5'IGR    | snoU14qL1  | AAGGTATGTTGCGCGTATGC    | Fig. 3A, 5F, 6B, 6C, 6F, EV3A, EV3D |
|                 | snoU14qR1  | GTCGATAGGACGGGTAAGAAG   |                                     |
| snoU14 CDS      | snoU14qL3  | CATTGAACATTCGAGTTTCC    | Fig. EV3D                           |
|                 | snoU14qR3  | GAAGGACTATGCACGACATCTG  |                                     |
| snoU14 3'IGR    | snoU14qL2  | TGATGGAATGTAGTCTGGTTG   | Fig. EV7                            |
|                 | snoU14qR2  | TTAATTGCCATTCTACGCATTG  |                                     |
| exg1 5'IGR      | exg1qL2    | CGCGGTAAGCCACAATAAAC    | Fig. 4B, 4E, 5F, 6B, 6F, EV3D, EV5B |
|                 | exg1qR2    | CTGCTTGGATTTGCGTACTG    |                                     |



|                       |                            |                                                   |                                                |
|-----------------------|----------------------------|---------------------------------------------------|------------------------------------------------|
| exg1 CDS              | exg1qL1<br>exg1qR1         | GACGGTAAATGAGCCTTTGG<br>AGCTGGAAAGAGGATTGACG      | Fig. 3A, 6C, EV3A, EV3D                        |
| exg1 3'IGR            | exg1qL3<br>exg1qR3         | CACATAGACGGACCACTTTGAG<br>ATATGTACCTGTGGCTGAGTG   | Fig. EV5, EV7                                  |
| cdc22 5'IGR           | cdc22qL4<br>cdc22qR4       | GTCGGACTTATTTTAGCGGAAC<br>TGAAACCGGATCATTTTTG     | Fig. 4B, 4E, 5F, 6B, 6F,<br>EV3D, EV5B         |
| cdc22 CDS             | cdc22qL1<br>cdc22qR1       | AAGCTCGCCGTAGCAATATG<br>GAAGAAAGCATCGGCAAGAC      | Fig. 3A, 6C, EV3A, EV3D                        |
| cdc22 3'IGR           | cdc22qL3<br>cdc22qR3       | CGGGCTAAATTGAGGTATGG<br>CGCAGTTGCACTTTTCAAAC      | Fig. EV5, EV7                                  |
| slp1 5'IGR            | eng1qL1<br>eng1qR1         | AACCTCACGAATCACCAAG<br>AGCATTTCGCCAAGAGCTAC       | Fig. 4B, 4E, 5F, 6B, 6F,<br>EV3D, EV5B         |
| slp1 CDS              | slp1 qL3<br>slp1 qR3       | ATGAGGGCTCCAAATCAGTG<br>GTGCCCTTGGCAAAGTAATC      | Fig. 3A, 6C, EV3D                              |
| slp1 3'IGR            | slp1 qL4<br>slp1 qR4       | CACCCCTAAAGGTGGAATTG<br>ACCTTGGGGTGATCTGATTG      | Fig. EV7                                       |
| cnd1 5'IGR            | Cnd1-NDRqL1<br>Cnd1-NDRqR1 | ATAAATGGACCCCCACACAG<br>GATGGATTTGGCGTACTACATTC   | Fig. 4B, 4E, EV5B                              |
| cnd1 CDS              | cnd1qL1<br>cnd1qR1         | AGCAATTAGCCGAACGTCTG<br>CACCACATGATCCCATTGAC      | Fig. 3A                                        |
| rpl1502 5'IGR         | Rpl1502qL1<br>Rpl1502qR1   | AGTATTTTGGTGTCTTGCTCTCG<br>GCAAATTGTGACTGCTCCTG   | Fig. 4B                                        |
| rpl1502 CDS           | Rpl1502qL2<br>Rpl1502qR2   | TCGCTACTGCTCCAATTTGC<br>GAGAGGGATCAACGAGAATCAC    | Fig. 3A                                        |
| uge1 5'IGR            | Uge1qL1<br>Uge1qR1         | TCCGACGACCTCTTTGTTAC<br>AGCAAAAGCCACAATGAAGC      | Fig. 4B, 4E, EV5B                              |
| uge1 3'IGR            | Uge1qL3<br>Uge1qR3         | GAACCCTTTTCCCTTTCTG<br>CGGTATTATTAGCGACCTAATCG    | Fig. 3A                                        |
| 5S 5'IGR              | rDNA37qL1<br>rDNA37qR1     | TAGGATCGCTGAGAATCCATC<br>TGGATTAACACATTGCTTGC     | Fig. 3A, 4B, 4E, 5F, 6B,<br>6C, 6F, EV3A, EV5B |
| tRNA Gly05            | gly05qL1<br>gly05qR1       | GACGTTGTGCTAAAAGGTGTTG<br>GGAAATCGAGCAGAGGTCAG    | Fig. 3A, 6B, 6C, 6F,<br>EV3A, EV5B             |
| 18S                   | 18sqL1<br>18sqR1           | TTTCTAGGACCGCGTAATG<br>TGCTTTCGAGTAGTTCGTC        | Fig. EV3D                                      |
| Mnase-qPCR<br>prl53#1 | PrI53P4qL1<br>PrI53P4qR1   | CGCTGCCTCTATCACC AACT<br>CATGACAGAGCAAGCGACAG     | Fig. EV6C                                      |
| Mnase-qPCR<br>prl53#2 | PrI53V3qL1<br>PrI53V3qR1   | CCAACCTACCGCCCTTAC<br>GTGGTGTGGTGCCGTTAGT         | Fig. EV6C                                      |
| Mnase-qPCR<br>prl53#3 | PrI53P3qL1<br>PrI53P3qL1   | AAGCATTCTTAATAAGCTCCAACC<br>CGACGAAAGAACACGAGAG   | Fig. EV6C                                      |
| Mnase-qPCR<br>prl53#4 | PrI53P3qL3<br>PrI53P3qR3   | GCACCTTACTCAACGGTCGTA<br>AAAGATTAACGGTTGGAGCTTATT | Fig. EV6C                                      |
| Mnase-qPCR<br>prl53#5 | PrI53P3qL2<br>PrI53P3qR2   | GGTTGTCCTCCCAAGTTCT<br>CGACCGTTGAGTAAAGGTGCT      | Fig. EV6C                                      |
| Mnase-qPCR            | PrI53N2qL3                 | AATGGCCGTATCTTCACGTC                              | Fig. EV6C                                      |

|                        |                                |                                                      |           |
|------------------------|--------------------------------|------------------------------------------------------|-----------|
| prl53#6                | PrI53N2qR3                     | GAGTCTAGGAGATGGTCAGCCTTA                             |           |
| Mnase-qPCR<br>prl53#7  | prI53qL2<br>prI53qR2           | TAGTTTGTGGGGGAGTGG<br>TAGAACTGGGAGGGACAACC           | Fig. EV6C |
| Mnase-qPCR<br>prl53#8  | PrI53NDR2qL2<br>PrI53NDR2qR2   | TAGACCCGGATGGACTCTCC<br>CCACTCCCCAAACAACTA           | Fig. EV6C |
| Mnase-qPCR<br>prl53#9  | PrI53_NDR2qL1<br>PrI53_NDR2qR1 | CCCCTGGTACCTGTCCTCTT<br>GTCCATCCGGGTCTAGAAGG         | Fig. EV6C |
| Mnase-qPCR<br>prl53#10 | PrI53NDR1qL2<br>PrI53NDR1qR2   | CAACATTGCCTCCTCCTC<br>CGTACTCCAGGGACTGCTTT           | Fig. EV6C |
| Mnase-qPCR<br>prl53#11 | PrI53_NDR1qL1<br>PrI53_NDR1qR1 | CGACGGACTTCTCCCTGTGT<br>TTGGACGAGGAGAGGTGAGA         | Fig. EV6C |
| Mnase-qPCR<br>prl53#12 | PrI53V2qL1<br>PrI53V2qR1       | CCATTCTCCTCCTTGTTC<br>CGCTGTAAGTGGTGCAAG             | Fig. EV6C |
| Mnase-qPCR<br>prl53#13 | PrI53-P2qL1<br>PrI53P2qR1      | CGTTCATTATTGGCCTATCCA<br>GCAACAAGGAGGAGAAATGG        | Fig. EV6C |
| Mnase-qPCR<br>prl53#14 | PrI53P2qL2<br>PrI53P2qR2       | CGTAAACAATCATTAACTGAACTCTCA<br>AACGCTGGATAGGCCAAATAA | Fig. EV6C |

**Appendix Table S4. List of antibodies used in this study**

| <b>Application</b>                  | <b>Antibody</b>                                   |
|-------------------------------------|---------------------------------------------------|
| ChIP-Cnd2-GFP                       | rabbit polyclonal #A11122, Life Technologies      |
| ChIP-Gcn5-myc                       | rabbit polyclonal #A14, Santa Cruz                |
| W. blotting & ChIP anti-H3-Cterm    | rabbit polyclonal #ab1791 ChIP-grade, abcam       |
| W. Blotting & ChIP anti-H3K9ac      | rabbit polyclonal #07-352, upstate                |
| W. Blotting & ChIP anti-H3K18ac     | rabbit polyclonal #07-354, upstate                |
| W. Blotting anti-H3K14ac            | rabbit polyclonal #07-353, upstate                |
| ChIP anti-H3K14ac                   | rabbit polyclonal #06-911, upstate                |
| ChIP anti-H4                        | rabbit polyclonal #39177 ChIP-grade, active motif |
| ChIP anti-Snf21-Flag                | mouse monoclonal #M2, Sigma                       |
| W. Blotting anti - $\alpha$ tubulin | mouse monoclonal Tat1, Keith Gull                 |
| ChIP anti RNA Pol II (Ser2P)        | rabbit polyclonal #ab5095 ChIP-grade, abcam       |
